# Supplementary material
Source: PubMed Central journal article supplement (PMC7056423)
Supplement: tpmd190631.SD1.pdf [file tpmd190631.SD1.pdf]

Supplemental Appendix 1: Timeline of program and evaluation elements

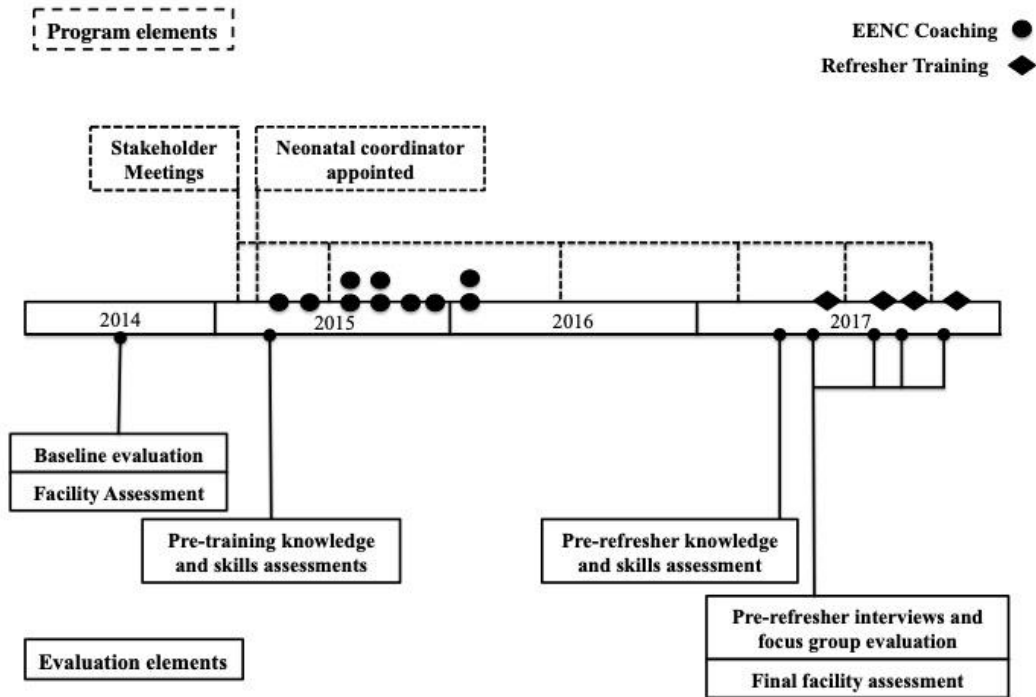

## Supplemental Appendix 2: Minimum Neonatal Equipment Standards

---

| <b>Item Description</b>                                                               | <b>Quantity for 10 bed unit<br/>(NRH)</b> | <b>Quantity for 6 bed unit<br/>(Provincial Hospital)</b> |
|---------------------------------------------------------------------------------------|-------------------------------------------|----------------------------------------------------------|
| <b>General</b>                                                                        |                                           |                                                          |
| Resuscitation trolley (radiant warmer, fixed height, drawers, oxygen tank attachment) | 3                                         | 2                                                        |
| Newborn self-inflating bag/mask resuscitation device 50ml                             | 6                                         | 4                                                        |
| Portable electronic suction machine                                                   | 3                                         | 2                                                        |
| Neonatal Cots (+Bedding/Blankets)                                                     | 12                                        | 6                                                        |
| Wall thermometer                                                                      | 1                                         | 1                                                        |
| HemoCue Glucose monitors                                                              | 3                                         | 1                                                        |
| Electronic Weighing Scale                                                             | 2                                         | 1                                                        |
| <b>Oxygen</b>                                                                         |                                           |                                                          |
| Oxygen Concentrator                                                                   | 4                                         | 2                                                        |
| Paediatric oxygen tubing                                                              |                                           |                                                          |
| Paediatric oxygen cannulae                                                            |                                           |                                                          |
| Portable Neonatal/Infant Oximeter (+ probes)                                          | 6                                         | 3                                                        |
| <b>Monitoring</b>                                                                     |                                           |                                                          |
| Apnoea monitor                                                                        | 4                                         | 2                                                        |
| ECG machine                                                                           | 1                                         | 1                                                        |
| Neonatal Monitor (HR,SpO2, ECG, RR, Temp)                                             | 6                                         | 2                                                        |
| Digital Thermometer                                                                   | 6                                         | 3                                                        |
| Timing Device/Clock                                                                   | 2                                         | 1                                                        |
